# Supplementary material for: Vanadium carbide: an efficient, robust, and versatile cocatalyst for photocatalytic hydrogen evolution under visible light
Source: Royal Society of Chemistry journal article supplement (doi:10.1039/c9cc03230d), 2019-01-01
Supplement: c9cc03230d1.pdf [file c9cc03230d1.pdf]

## Electronic Supplementary Information

### **Vanadium carbide: an efficient, robust, and versatile cocatalyst for photocatalytic hydrogen evolution under visible light**

Lei Tian,<sup>a,b,c</sup> Shixiong Min,<sup>\*a,b,c</sup> Yonggang Lei,<sup>a,b,c</sup> Shasha Chen<sup>a,b,c</sup> and Fang  
Wang<sup>a,b,c</sup>

*<sup>a</sup>School of Chemistry and Chemical Engineering, Key Laboratory of Electrochemical  
Energy Conversion Technology and Application, North Minzu University, Yinchuan,  
750021, P. R. China. E-mail: sxmin@nun.edu.cn.*

*<sup>b</sup>Key Laboratory of Chemical Engineering and Technology, State Ethnic Affairs  
Commission, North Minzu University, Yinchuan, 750021, P. R. China.*

*<sup>c</sup>Ningxia Key Laboratory of Solar Chemical Conversion Technology, North Minzu  
University, Yinchuan 750021, P. R. China.*

## **1. Experimental section**

### **1.1 Chemicals and materials**

All chemicals were of analytical grade and used as received without further purification. VC powder were purchased from Hefei Zhonghang Nanometer Technology Development Co., Ltd. CdS and Zn<sub>0.5</sub>Cd<sub>0.5</sub>S were synthesized according to our previous reports.<sup>1,2</sup> All solutions used throughout the experiments were prepared with ultrapure water (18.2 MΩ).

### **1.2 Characterization**

Transmission electron microscopy (TEM) and high-resolution TEM (HRTEM) images were taken with a Tecnai-G<sup>2</sup>-F30 field emission transmission electron microscope. X-ray diffraction (XRD) patterns were investigated with a Rigaku smartlab diffractometer with a nickel filtrated Cu K $\alpha$  radiation. X-ray photoelectron spectroscopy (XPS) measurements of the samples were performed on a Thermo Scientific Escalab-250Xi electron spectrometer using an Al K $\alpha$  X-ray source. Binding energies were referenced to the C 1s peak (set at 284.8 eV) of the sp<sup>2</sup> hybridized (C=C) carbon from the sample. UV-vis diffuse reflectance spectra were recorded on a PerkinElmer Lambda-750 UV-vis-near-IR spectrometer equipped with an integrating sphere and BaSO<sub>4</sub> powders were used as a reflectance standard. UV-vis absorption spectra were taken with a Thermo Scientific-Evolution 220 spectrophotometer. Photoluminescence spectra were determined by a Horiba Scientific FluoroMax-4 spectrofluorometer spectrometer.

### **1.3 Photocatalytic hydrogen evolution experiments**

The photocatalytic hydrogen evolution experiments were performed in a sealed Pyrex reactor with a top flat quartz window for light irradiation and a silicone rubber septum was fixed on its side for sampling produced H<sub>2</sub> in the headspace of reaction cell. In a typical procedure, ErB and VC powder were added to a solution containing 100 mL of 15 vol.% TEOA aqueous solution under vigorous stirring. The pH values of the reaction solution were adjusted by addition of hydrochloric acid or sodium hydroxide. For testing the versatility of VC as a H<sub>2</sub> evolution cocatalyst of semiconductor-based photocatalysts such as CdS and Zn<sub>0.5</sub>Cd<sub>0.5</sub>S, a 300-W Xe lamp equipped with an optical

cut-off filter ( $\lambda \geq 420$  nm) was used as a light source. The reaction mixture solution was prepared by directly mixing CdS or  $\text{Zn}_{0.5}\text{Cd}_{0.5}\text{S}$  (44 mg) and VC (5 mg) powder in reaction cell containing 100 mL of 10 vol.% lactic acid under vigorous stirring. Then, the reaction solution was thoroughly degassed by repeated evacuation- $\text{N}_2$  filling, and finally refilled with  $\text{N}_2$  to reach ambient pressure. After that, the reaction solution was irradiated by a 30-W LED lamp equipped with an optical cut-off filter ( $\lambda \geq 420$  nm). During the reaction, the mixture solution was continuously stirred. The amount of  $\text{H}_2$  produced was manually taken out by a gas-tight syringe (Agilent, 1.0 mL) and analyzed at given time intervals with a precalibrated gas chromatography (Tech comp; GC-7900) with a thermal conductivity detector, a 5 Å molecular sieve column (4 mm $\times$ 5 m), and with  $\text{N}_2$  as carrying gas.

#### **1.4 Electrocatalytic hydrogen evolution reactions**

The electrochemical measurements were carried out in a standard three-electrode electrochemical set-up using a CHI660E potentiostat. The saturated Ag/AgCl and graphite rod were used as reference electrode and counter electrode, respectively. The working electrodes were prepared by drop-casting ethanol/water solution containing VC powder (5 mg mL<sup>-1</sup>) onto the carbon paper (HESEN, HCP030P, thickness, 0.3 mm). The loading amount of VC on carbon paper was controlled to be 0.8 mg cm<sup>-2</sup>. The electrocatalytic activity of VC towards  $\text{H}_2$  evolution was examined by obtaining polarization curves using linear sweep voltammetry (LSV) at a scan rate of 5 mV s<sup>-1</sup> in a 0.5 M  $\text{Na}_2\text{SO}_4$  solution containing TEOA (15 vol.%, pH 9). All the applied potentials are reported as reversible hydrogen electrode potential scale using  $E$  (vs. RHE) =  $E$  (vs. Ag/AgCl) + 0.2142 V after IR correction. Potentiostatic EIS was used to determine the uncompensated solution resistance ( $R_s$ ).

## **2. Additional figures**

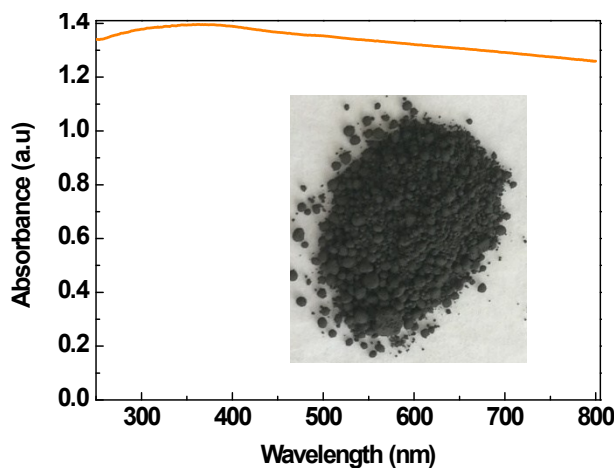

Fig. S1 UV-vis absorption spectrum along with the color of VC catalyst.

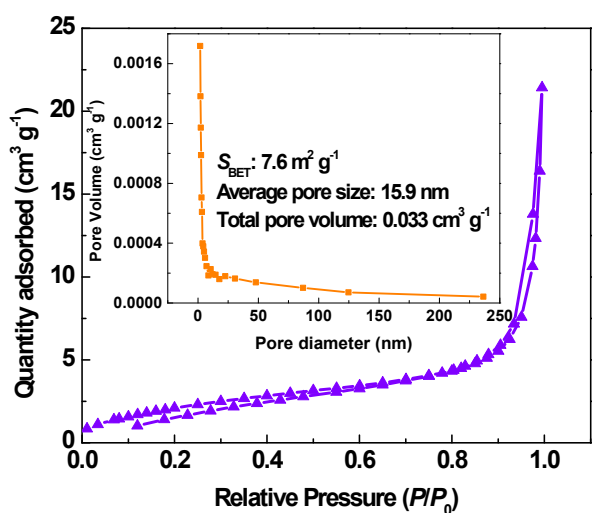

Fig. S2 N<sub>2</sub> adsorption-desorption isotherm and pore size distribution (inset) of VC.

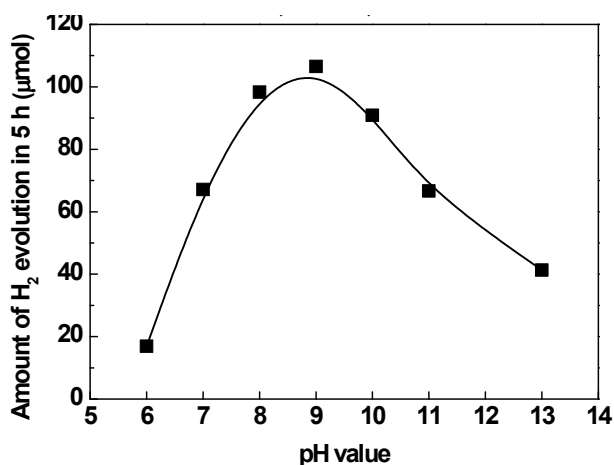

Fig. S3 H<sub>2</sub> evolution from TEOA (15 vol.%, 100 mL) solution containing VC (1 mM) and ErB (0.5 mM) at different pH values. Light source, white LED lamp (30 W),  $\lambda \geq 420$  nm.

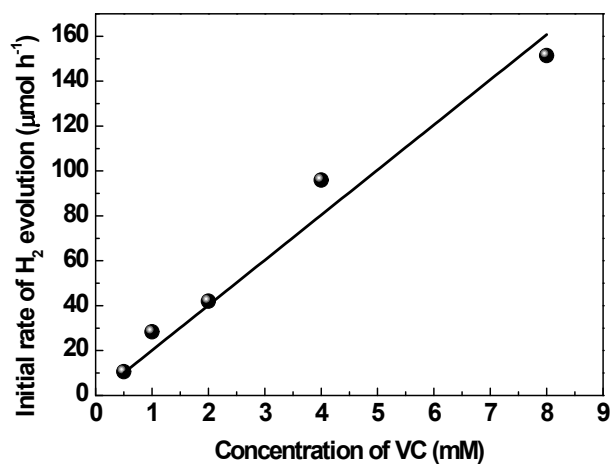

**Fig. S4** Initial rate of H<sub>2</sub> evolution from TEOA solution (15 vol.%, 100 mL, pH 9) containing ErB (0.5 mM) and different concentrations of VC catalyst. Light source, white LED lamp (30 W),  $\lambda \geq 420$  nm.

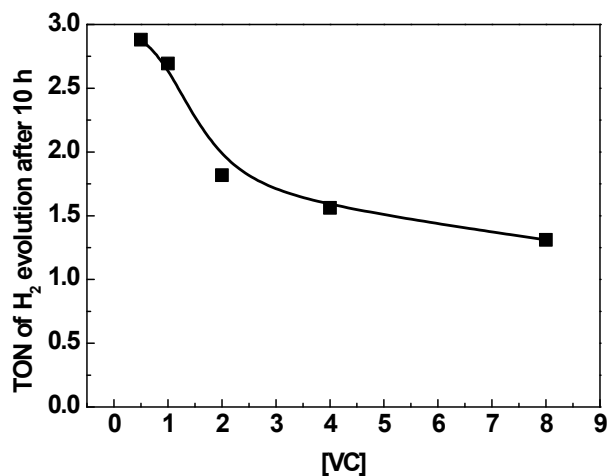

**Fig. S5** TON of H<sub>2</sub> evolution from TEOA solution (15 vol.%, 100 mL, pH 9) containing ErB (0.5 mM) and different concentrations of VC catalyst. Light source, white LED lamp (30 W),  $\lambda \geq 420$  nm.

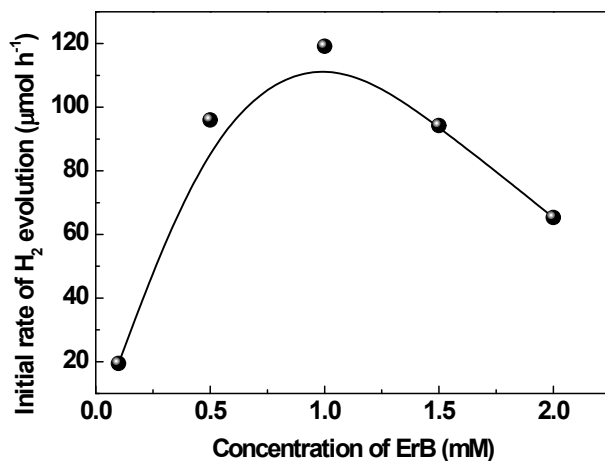

**Fig. S6** Initial rate of H<sub>2</sub> evolution from TEOA solution (15 vol.%, 100 mL, pH 9)

containing VC (4 mM) and different concentrations of ErB. Light source, white LED lamp (30 W),  $\lambda \geq 420$  nm.

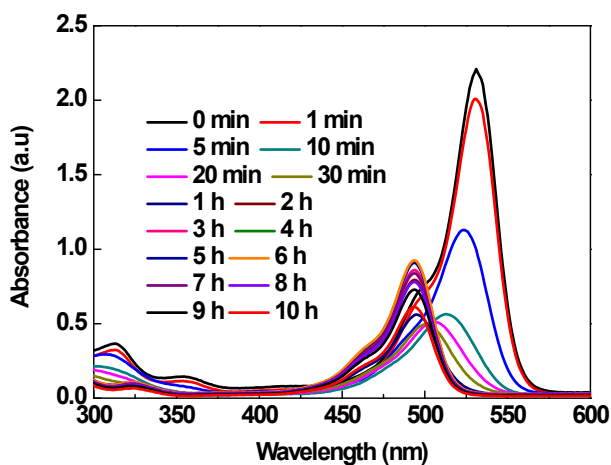

**Fig. S7** Absorption spectra of systems containing ErB (0.5 mM) and VC (4.0 mM) in TEOA solution (15 vol.%, 100 mL, pH 9) upon irradiation. Light source, white LED lamp (30 W),  $\lambda \geq 420$  nm.

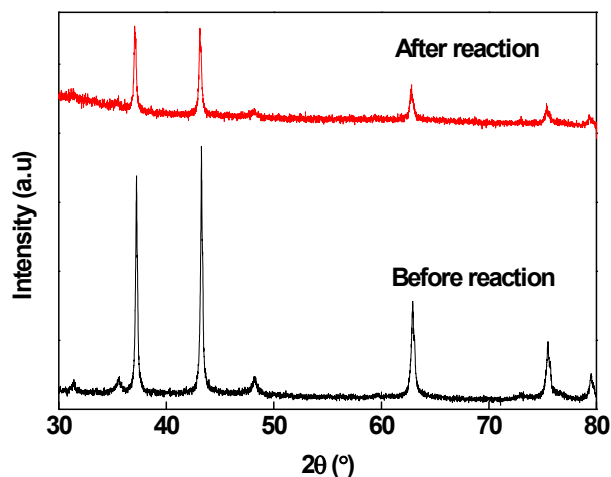

**Fig. S8** XRD patterns of VC catalyst before and after reactions.

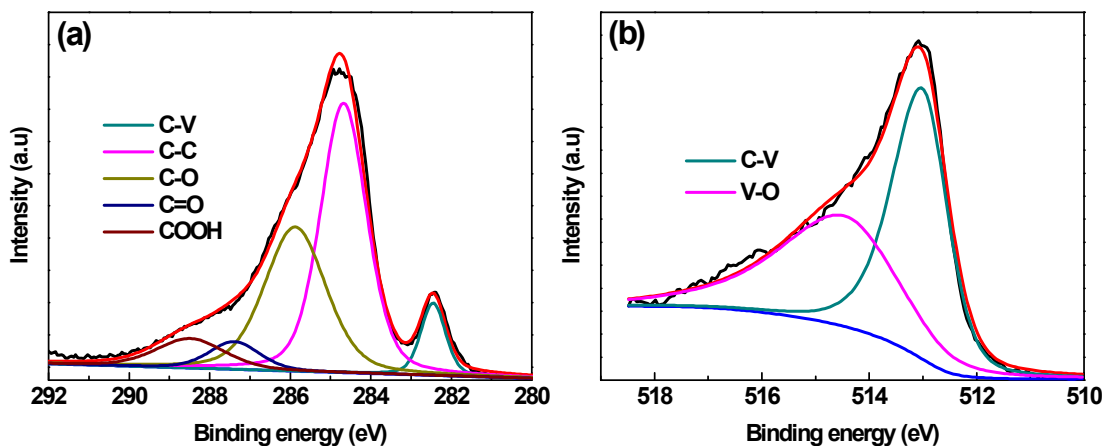

**Fig. S9** (a) C 1s and (b) V 2p XPS spectra of VC catalyst after H<sub>2</sub> evolution reaction.

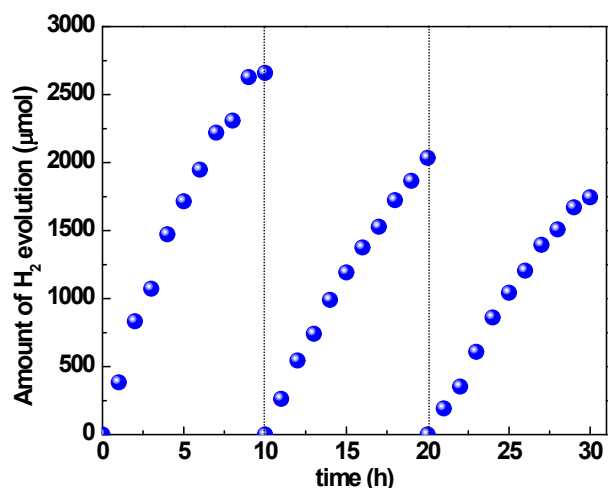

**Fig. S10** Stability test of photocatalytic H<sub>2</sub> evolution for CdS/VC.

**Table S1** Comparison of catalytic H<sub>2</sub> evolution activity of VC with other carbides.

| Photocatalyst                                      | Reaction conditions                                               | Light source                 | H <sub>2</sub> evolution rate (mmol h <sup>-1</sup> g <sub>carbide</sub> <sup>-1</sup> ) | Ref.      |
|----------------------------------------------------|-------------------------------------------------------------------|------------------------------|------------------------------------------------------------------------------------------|-----------|
| CdS/WC                                             | Lactic acid (10 vol.%), 100 mL                                    | 300 W Xe lamp, >420 nm       | 111.0                                                                                    | 3         |
| g-C <sub>3</sub> N <sub>4</sub> /Mo <sub>2</sub> C | Triethanolamine (10 vol.%), 100 mL                                | 300 W Xe lamp, >420 nm       | 50.7                                                                                     | 4         |
| CdS/Ti <sub>3</sub> C <sub>2</sub>                 | Lactic acid (25 vol.%), 80 mL                                     | 300 W Xe lamp, >420 nm       | 573.7                                                                                    | 5         |
| Ni <sub>3</sub> C/CdS                              | Na <sub>2</sub> S-Na <sub>2</sub> SO <sub>3</sub> (0.25 M), 80 mL | 350 W Xe lamp, >420 nm       | 1428.0                                                                                   | 6         |
|                                                    | Lactic acid (10 vol.%), 80 mL                                     |                              | 1802.0                                                                                   |           |
| CdS/VC                                             | Lactic acid (10 vol.%), 100 mL                                    | 300 W Xe lamp, >420 nm       | 38.8                                                                                     | This work |
| ErB/VC                                             | triethanolamine (15 vol.%), 100 mL                                | 30 W white LED lamp, >420 nm | 3.8                                                                                      | This work |

## References

1. Y. G. Lei, C. Yang, J. H. Hou, F. Wang, S. X. Min, X. H. Ma, Z. L. Jin, J. Xu, G. X. Lu and K. W. Huang, *Appl. Catal. B: Environ.*, 2017, **216**, 59.
2. F. Wang, Y. H. Su, S. X. Min, Y. N. Li, Y. G. Lei and J. H. Hou, *J. Solid State Chem.*, 2018, **260**, 23.
3. Y. X. Pan, H. Q. Zhuang, H. Ma, J. Cheng and J. Song, *Chem. Eng. Sci.*, 2019, **194**, 71.
4. J. Zhang, M. Wu, B. B. He, R. Wang, H. W. Wang and Y. S. Gong, *Appl. Surf. Sci.*, 2019, **470**, 565.
5. J. Ran, G. P. Gao, F. T. Li, T. Y. Ma, A. J. Du and S. Z. Qiao, *Nat. Commun.*, 2017, **8**, 13907.

6. S. Ma, Y. P. Deng, J. Xie, K. L. He, W. Liu, X. B. Chen and X. Li, *Appl. Catal. B: Environ.*, 2018, **227**, 218.
